# Supplementary material for: Acute Toxicity-Supported Chronic Toxicity Prediction: A k-Nearest Neighbor Coupled Read-Across Strategy
Source: PubMed Central journal article supplement (PMC4463722; doi:10.3390/ijms160511659), 2015-05-21
Supplement: ijms-16-11659-s001.pdf [file ijms-16-11659-s001.pdf]

## Supplementary Information

**Table S1.** Total 235 effects.

| <b>Sr.</b> | <b>Effect</b>                  |
|------------|--------------------------------|
| 1          | Albumin/Globulin ↑             |
| 2          | Albumin/Globulin ↓             |
| 3          | Abnormal appearance            |
| 4          | Abnormal behavior              |
| 5          | Abnormal body position         |
| 6          | Abnormal breathing             |
| 7          | Abnormal fur                   |
| 8          | Abnormal gait                  |
| 9          | Abnormal response in handling  |
| 10         | Abnormal sensory response      |
| 11         | Absolute organ weight ↑        |
| 12         | Absolute organ weight ↓        |
| 13         | Alb ↑                          |
| 14         | Alb ↓                          |
| 15         | ALP ↑                          |
| 16         | ALP ↓                          |
| 17         | ALT(GPT) ↑                     |
| 18         | ALT(GPT) ↓                     |
| 19         | Amy ↑                          |
| 20         | Amy ↓                          |
| 21         | Anisonucleosis/Mitosis         |
| 22         | APTT ↑                         |
| 23         | APTT ↓                         |
| 24         | AST(GOT) ↑                     |
| 25         | AST(GOT) ↓                     |
| 26         | Atrophy                        |
| 27         | Atrophy (necropsy)             |
| 28         | Atrophy lymph follicle         |
| 29         | Atrophy mucosa                 |
| 30         | Atrophy pelvis                 |
| 31         | Atrophy seminiferous           |
| 32         | BASO ↑                         |
| 33         | BASO ↓                         |
| 34         | Basophilic change/Regeneration |
| 35         | Bile thrombus                  |
| 36         | Bilirubin ↑                    |
| 37         | Bilirubin ↓                    |
| 38         | Body weight ↑                  |
| 39         | Body weight ↓                  |
| 40         | BUN ↑                          |
| 41         | BUN ↓                          |
| 42         | Calcium ↑                      |
| 43         | Calcium ↓                      |
| 44         | Castration cell ↑              |

**Table S1. Cont.**

| <b>Sr.</b> | <b>Effect</b>                           |
|------------|-----------------------------------------|
| 45         | Casts                                   |
| 46         | Cell debris germ cell                   |
| 47         | Cell hypertrophy                        |
| 48         | Cell infiltration                       |
| 49         | Change in globulin fraction             |
| 50         | ChE ↑(Plasma/RBC/Brain)                 |
| 51         | ChE ↓(Plasma/RBC/Brain)                 |
| 52         | Chloride ↑                              |
| 53         | Chloride ↓                              |
| 54         | Cl ↑                                    |
| 55         | Cl ↓                                    |
| 56         | Colloid ↓                               |
| 57         | Coma                                    |
| 58         | Congestion                              |
| 59         | CPK ↑                                   |
| 60         | CPK ↓                                   |
| 61         | Creatinine ↑                            |
| 62         | CT ↑                                    |
| 63         | CT ↓                                    |
| 64         | Cyanosis or pale skin                   |
| 65         | Death                                   |
| 66         | Degeneration nerve fiber                |
| 67         | Degeneration, germ cell                 |
| 68         | Degeneration, semiferous tubule         |
| 69         | Degeneration, vacuolar                  |
| 70         | Degradation epididymis                  |
| 71         | Degradation, nerve fiber                |
| 72         | Desquamation tubular epithelium cell    |
| 73         | Diarrhea/Loose stool/Bloody stool       |
| 74         | Dilatation (necropsy)                   |
| 75         | Discoloration                           |
| 76         | Edema                                   |
| 77         | emaciation                              |
| 78         | Enlarged                                |
| 79         | Enlarged (necropsy)                     |
| 80         | Enlarged pelvis                         |
| 81         | Eosinophilic body/Hyaline droplets      |
| 82         | Eosinophilic hepatocyte (Centrilobular) |
| 83         | Eosinophilic hepatocyte (Other)         |
| 84         | Eosinophilic hepatocyte (Periportal)    |
| 85         | EOSN ↑                                  |
| 86         | EOSN ↓                                  |
| 87         | Erosin                                  |
| 88         | Extramedullary hematopoiesis            |
| 89         | Fatty change                            |

**Table S1. Cont.**

| <b>Sr.</b> | <b>Effect</b>                                   |
|------------|-------------------------------------------------|
| 90         | Fatty change pelvis                             |
| 91         | Fatty change/Vacuolization ↑(Other)             |
| 92         | Fatty change/Vacuolization ↑(Periportal)        |
| 93         | Fatty change/Vacuolization ↓(Centrilobular)     |
| 94         | Fatty change/Vacuolization ↓(Other)             |
| 95         | Fatty change/Vacuolization ↓(Periportal)        |
| 96         | Fatty change/Vacuolization ↑(Centrilobular)     |
| 97         | Fibrinogen ↑                                    |
| 98         | Fibrinogen ↓                                    |
| 99         | Fibrosis                                        |
| 100        | Foamy cell accumulation                         |
| 101        | Food consumption ↑                              |
| 102        | Food consumption ↓                              |
| 103        | Germ cell ↓                                     |
| 104        | Glucose ↑                                       |
| 105        | Glucose ↓                                       |
| 106        | Hematopoiesis extramedullary                    |
| 107        | Hematopoiesis ↑                                 |
| 108        | Hematopoiesis ↓                                 |
| 109        | Hemorrhage                                      |
| 110        | HGB ↑                                           |
| 111        | HGB ↓                                           |
| 112        | HTC ↑                                           |
| 113        | HTC ↓                                           |
| 114        | Hyperkeratosis, Parakeratosis                   |
| 115        | Hyperkeratosis/Parakeratosis                    |
| 116        | Hyperplasia epithelium                          |
| 117        | Hyperplasia leydig cell                         |
| 118        | Hyperplasia lymph follicle                      |
| 119        | Hyperplasia/hypertrophy                         |
| 120        | Hyperplasia/Hypertrophy follicular cell         |
| 121        | Hyperplasia/thickened epithelial cell           |
| 122        | Hyperplasia/Thickneing epithelium               |
| 123        | Hyperplasia/thicknening epithelium              |
| 124        | Hyperthermia                                    |
| 125        | Hypertrophy epithelium                          |
| 126        | Hypertrophy/Swelling hepatocyte (Centrilobular) |
| 127        | Hypertrophy/Swelling hepatocyte (Other)         |
| 128        | Hypertrophy/Swelling hepatocyte (Periportal)    |
| 129        | Hypothermia                                     |
| 130        | I. phosphorus ↑                                 |
| 131        | I. phosphorus ↓                                 |
| 132        | Inflamation                                     |
| 133        | K ↑                                             |
| 134        | K ↓                                             |

**Table S1. Cont.**

| <b>Sr.</b> | <b>Effect</b>                       |
|------------|-------------------------------------|
| 135        | Ketone body ↑                       |
| 136        | Ketone body ↓                       |
| 137        | Lacrimation                         |
| 138        | LDH ↑                               |
| 139        | LDH ↓                               |
| 140        | Locomotor activity ↑                |
| 141        | Locomotor activity ↓                |
| 142        | LYMPH ↑                             |
| 143        | LYMPH ↓                             |
| 144        | MCH ↑                               |
| 145        | MCH ↓                               |
| 146        | MCHC ↑                              |
| 147        | MCHC ↓                              |
| 148        | MCV ↑                               |
| 149        | MCV ↓                               |
| 150        | Methemoglobin ↑                     |
| 151        | Mineralization                      |
| 152        | Miosis                              |
| 153        | MONO ↑                              |
| 154        | MONO ↓                              |
| 155        | Multinucleated giant cell           |
| 156        | Muscle strength ↓                   |
| 157        | Mustle tone ↓                       |
| 158        | Mydriasis                           |
| 159        | Mydriasis                           |
| 160        | Myelogram                           |
| 161        | Myocardial degradation              |
| 162        | Myocardial fibrosis                 |
| 163        | Myocardial necrosis                 |
| 164        | Na ↑                                |
| 165        | Na ↓                                |
| 166        | Necrosis                            |
| 167        | Necrosis germ cell                  |
| 168        | Necrosis hepatocyte (Centrilobular) |
| 169        | Necrosis hepatocyte (Other)         |
| 170        | Necrosis hepatocyte (Periportal)    |
| 171        | Necrosis pelvis                     |
| 172        | NEUT ↑                              |
| 173        | NEUT ↓                              |
| 174        | Occult blood                        |
| 175        | osmic pressure ↑                    |
| 176        | osmic pressure ↓                    |
| 177        | Other findings                      |
| 178        | pH ↑                                |
| 179        | pH ↓                                |

**Table S1. Cont.**

| <b>Sr.</b> | <b>Effect</b>              |
|------------|----------------------------|
| 180        | Pigmentation (Hemosiderin) |
| 181        | Pigmentation (Other)       |
| 182        | Piloerection               |
| 183        | PL ↑                       |
| 184        | PL ↓                       |
| 185        | PLT ↑                      |
| 186        | PLT ↓                      |
| 187        | Potassium ↑                |
| 188        | Potassium ↓                |
| 189        | Proliferation              |
| 190        | Protein ↑                  |
| 191        | Protein ↓                  |
| 192        | PT ↑                       |
| 193        | PT ↓                       |
| 194        | Ptosis/Palpebral closure   |
| 195        | Pupillary light reflex     |
| 196        | RBC ↑                      |
| 197        | RBC ↓                      |
| 198        | Relative organ weight ↑    |
| 199        | Relative organ weight ↓    |
| 200        | Retention germ cell        |
| 201        | Reticulocyte ↑             |
| 202        | Reticulocyte ↓             |
| 203        | Salivation                 |
| 204        | Sodium ↑                   |
| 205        | Sodium ↓                   |
| 206        | Specific gravity ↑         |
| 207        | Specific gravity ↓         |
| 208        | Straub tail                |
| 209        | T. bilirubin ↑             |
| 210        | T. bilirubin ↓             |
| 211        | T. cholesterol ↑           |
| 212        | T. cholesterol ↓           |
| 213        | T. protein ↑               |
| 214        | T. protein ↓               |
| 215        | Total                      |
| 216        | Tremor/Convulsion          |
| 217        | Triglyceride ↑             |
| 218        | Triglyceride ↓             |
| 219        | Ulcer                      |
| 220        | Urinary sediment           |
| 221        | Urine volume ↑             |
| 222        | Urine volume ↓             |
| 223        | Urobilinogen ↑             |
| 224        | Urobilinogen ↓             |

**Table S1. Cont.**

| <b>Sr.</b> | <b>Effect</b>             |
|------------|---------------------------|
| 225        | Vacuolization             |
| 226        | Vacuolization germ cell   |
| 227        | Vacuolization pelvis      |
| 228        | Vacuolization sertli cell |
| 229        | Vocalization              |
| 230        | Water consumption ↑       |
| 231        | Water consumption ↓       |
| 232        | WBC ↑                     |
| 233        | WBC ↓                     |
| 234        | γ-GTP ↑                   |
| 235        | γ-GTP ↓                   |

**Table S2.** Description of 118 chemicals and their corresponding acute and chronic toxicity values.

| Sr. | CAS        | LD50<br>(mg/kg/d) | LOEL<br>(mg/kg/d) | SMILES                                                           | Study Period<br>(Day) |
|-----|------------|-------------------|-------------------|------------------------------------------------------------------|-----------------------|
| 1   | 100-54-9   | 1185              | 30                | <chem>C(#N)c1cccnc1</chem>                                       | 28                    |
| 2   | 100-69-6   | 100               | 50                | <chem>c1(C=C)cccn1</chem>                                        | 28                    |
| 3   | 100-74-3   | 1780              | 200               | <chem>C1CN(CC)CCO1</chem>                                        | 28                    |
| 4   | 101-14-4   | 1140              | 10                | <chem>c1(N)c(Cl)cc(Cc2cc(Cl)c(N)cc2)cc1</chem>                   | 42                    |
| 5   | 101-72-4   | 720               | 30                | <chem>c1(NC(C)C)ccc(Nc2ccccc2)cc1</chem>                         | 28                    |
| 6   | 101-83-7   | 373               | 70                | <chem>C1(NC2CCCCC2)CCCCC1</chem>                                 | 28                    |
| 7   | 102-06-7   | 323               | 30                | <chem>c1(NC(=N)Nc2ccccc2)ccccc1</chem>                           | 28                    |
| 8   | 1025-15-6  | 1000              | 5                 | <chem>C1(=O)N(CC=C)C(=O)N(CC=C)C(=O)N1CC=C</chem>                | 28                    |
| 9   | 102-81-8   | 1070              | 100               | <chem>C(CCC)N(CCCC)CCO</chem>                                    | 28                    |
| 10  | 103-44-6   | 1350              | 30                | <chem>C(CCCC)(CC)COC=C</chem>                                    | 28                    |
| 11  | 105-16-8   | 4696              | 150               | <chem>C(=O)(C=C)C)OCCN(CC)CC</chem>                              | 44                    |
| 12  | 105-99-7   | 12,900            | 1000              | <chem>C(=O)(CCCCC(=O)OCCCC)OCCCC</chem>                          | 28                    |
| 13  | 106-91-2   | 500               | 30                | <chem>C(=O)(C=C)C)OCC1CO1</chem>                                 | 45                    |
| 14  | 107-02-8   | 26                | 0.75              | <chem>C=CC=O</chem>                                              | 98                    |
| 15  | 107-06-2   | 670               | 30                | <chem>ClCCCl</chem>                                              | 91                    |
| 16  | 1071-83-6  | 4873              | 3130              | <chem>O=C(O)CNCP(=O)(O)O</chem>                                  | 91                    |
| 17  | 107-18-6   | 64                | 1.5               | <chem>C=CCO</chem>                                               | 98                    |
| 18  | 107-66-4   | 3200              | 100               | <chem>C(CCC)OP(=O)(O)OCCCC</chem>                                | 44                    |
| 19  | 108-42-9   | 256               | 10                | <chem>Nc1cc(Cl)ccc1</chem>                                       | 93                    |
| 20  | 108-44-1   | 450               | 30                | <chem>c1(N)cc(C)ccc1</chem>                                      | 42                    |
| 21  | 108-65-6   | 8532              | 1000              | <chem>C(C)(=O)OC(C)COC</chem>                                    | 42                    |
| 22  | 108-69-0   | 707               | 60                | <chem>c1(N)cc(C)cc(C)c1</chem>                                   | 28                    |
| 23  | 108-80-5   | 7700              | 600               | <chem>C1(=O)NC(=O)NC(=O)N1</chem>                                | 44                    |
| 24  | 109-70-6   | 930               | 20                | <chem>C(Br)CCCl</chem>                                           | 28                    |
| 25  | 109-86-4   | 2370              | 750               | <chem>OCCOC</chem>                                               | 91                    |
| 26  | 110-02-1   | 1400              | 25                | <chem>C1C=CSC=1</chem>                                           | 42                    |
| 27  | 110-63-4   | 1525              | 200               | <chem>C(O)CCCO</chem>                                            | 42                    |
| 28  | 110-80-5   | 2125              | 1250              | <chem>CCOCCO</chem>                                              | 91                    |
| 29  | 111-17-1   | 3000              | 1000              | <chem>C(=O)(O)CCSCCC(=O)O</chem>                                 | 28                    |
| 30  | 111-41-1   | 3000              | 250               | <chem>C(O)CNCCN</chem>                                           | 28                    |
| 31  | 112-26-5   | 250               | 200               | <chem>C(Cl)COCCOCCCl</chem>                                      | 28                    |
| 32  | 115-77-5   | 19,500            | 300               | <chem>C(CO)(CO)(CO)CO</chem>                                     | 46                    |
| 33  | 118-75-2   | 4000              | 160               | <chem>C1(Cl)C(=O)C(Cl)=C(Cl)C(=O)C=1Cl</chem>                    | 28                    |
| 34  | 119-47-1   | 10,000            | 50                | <chem>C(C)(C)(C)c1c(O)c(Cc2c(O)c(C(C)(C)C)cc(C)c2)cc(C)c1</chem> | 28                    |
| 35  | 121-03-9   | 3710              | 350               | <chem>c1(C)c(S(=O)(=O)O)cc(N(=O)=O)cc1</chem>                    | 50                    |
| 36  | 121-45-9   | 1600              | 60                | <chem>COP(OC)OC</chem>                                           | 28                    |
| 37  | 123-30-8   | 375               | 100               | <chem>c1(O)ccc(N)cc1</chem>                                      | 28                    |
| 38  | 123-42-2   | 2520              | 100               | <chem>C(C)(=O)CC(C)(C)O</chem>                                   | 44                    |
| 39  | 126-98-7   | 120               | 30                | <chem>C(#N)C(=C)C</chem>                                         | 46                    |
| 40  | 131-57-7   | 7400              | 3130              | <chem>COC1=CC(=C(C=C1)C(=O)C2=CC=CC=C2)O</chem>                  | 91                    |
| 41  | 14047-09-7 | 5000              | 0.1               | <chem>Clc2ccc(/N=N/c1ccc(Cl)c(Cl)c1)cc2Cl</chem>                 | 91                    |
| 42  | 141-02-6   | 29,200            | 1000              | <chem>O=C(OCC(CC)CCCC)C=C\C(=O)OCC(CCCCC)CC</chem>               | 28                    |
| 43  | 141-17-3   | 6000              | 1000              | <chem>C(=O)(CCCCC(=O)OCCOCCOCCCC)OCCOCCOCCCC</chem>              | 28                    |

Table S2. Cont.

| Sr. | CAS        | LD50<br>(mg/kg/d) | LOEL<br>(mg/kg/d) | SMILES                                                   | Study Period<br>(Day) |
|-----|------------|-------------------|-------------------|----------------------------------------------------------|-----------------------|
| 44  | 156-43-4   | 540               | 40                | <chem>c1(OCC)ccc(N)cc1</chem>                            | 28                    |
| 45  | 2173-57-1  | 5930              | 100               | <chem>c12c(cc(OCC(C)C)cc1)cccc2</chem>                   | 28                    |
| 46  | 2439-35-2  | 455               | 20                | <chem>C(=O)(C=C)OCCN(C)C</chem>                          | 43                    |
| 47  | 24800-44-0 | 3000              | 1000              | <chem>C(C)(O)COC(C)COC(C)CO</chem>                       | 49                    |
| 48  | 2579-20-6  | 880               | 300               | <chem>C1(CN)CC(CN)CCC1</chem>                            | 56                    |
| 49  | 2867-47-2  | 1751              | 200               | <chem>C(=O)(C(=C)C)OCCN(C)C</chem>                       | 43                    |
| 50  | 298-06-6   | 4510              | 30                | <chem>C(C)OP(=S)(S)OCC</chem>                            | 42                    |
| 51  | 330-54-1   | 1017              | 20                | <chem>c1(Cl)c(Cl)cc(NC(=O)N(C)C)cc1</chem>               | 42                    |
| 52  | 40766-31-2 | 2050              | 30                | <chem>c1(C)c(C)cc(C(C)c2cccc2)cc1</chem>                 | 28                    |
| 53  | 4979-32-2  | 6420              | 100               | <chem>c12c(cccc1)N=C(SN(C1CCCCC1)C1CCCCC1)S2</chem>      | 44                    |
| 54  | 50892-23-4 | 1050              | 5                 | <chem>CC1=C(C(=CC=C1)NC2=CC(=NC(=N2)SCC(=O)O)Cl)C</chem> | 98                    |
| 55  | 512-56-1   | 840               | 40                | <chem>COP(=O)(OC)OC</chem>                               | 42                    |
| 56  | 51-79-6    | 1809              | 110               | <chem>CCOC(=O)N</chem>                                   | 91                    |
| 57  | 556-61-6   | 72                | 2                 | <chem>C(=S)=NC</chem>                                    | 42                    |
| 58  | 583-39-1   | 300               | 1.2               | <chem>c12c(cccc1)N=C(S)N2</chem>                         | 28                    |
| 59  | 584-03-2   | 16,000            | 1000              | <chem>C(O)(CC)CO</chem>                                  | 42                    |
| 60  | 591-27-5   | 924               | 240               | <chem>c1(O)cc(N)ccc1</chem>                              | 28                    |
| 61  | 591-87-7   | 130               | 6                 | <chem>CC(=O)OCC=C</chem>                                 | 98                    |
| 62  | 608-93-5   | 1080              | 33                | <chem>Clc1cc(Cl)c(Cl)c(Cl)c1Cl</chem>                    | 91                    |
| 63  | 614-45-9   | 1012              | 30                | <chem>CC(C)(C)OOC(=O)C1=CC=CC=C1</chem>                  | 91                    |
| 64  | 620-92-8   | 4950              | 250               | <chem>c1(O)ccc(Cc2ccc(O)cc2)cc1</chem>                   | 28                    |
| 65  | 623-91-6   | 1780              | 11                | <chem>CCOC(=O)C=CC(=O)OCC</chem>                         | 46                    |
| 66  | 6317-18-6  | 55                | 2                 | <chem>N#CSCSC#N</chem>                                   | 91                    |
| 67  | 638-16-4   | 9500              | 62.5              | <chem>C1(=S)NC(=S)NC(=S)N1</chem>                        | 42                    |
| 68  | 6731-36-8  | 12,918            | 100               | <chem>C1(OOC(C)(C)C)(OOC(C)(C)C)CC(C)(C)CC(C)C1</chem>   | 28                    |
| 69  | 700-13-0   | 3200              | 10                | <chem>c1(O)c(C)c(C)c(O)c(C)c1</chem>                     | 42                    |
| 70  | 75-50-3    | 500               | 40                | <chem>CN(C)C</chem>                                      | 42                    |
| 71  | 75-66-1    | 4729              | 10                | <chem>C(C)(C)(C)S</chem>                                 | 42                    |
| 72  | 77-73-6    | 353               | 20                | <chem>C1C2C(C3C=CC2C3)CC=1</chem>                        | 44                    |
| 73  | 77-99-6    | 14,100            | 200               | <chem>C(CC)(CO)(CO)CO</chem>                             | 45                    |
| 74  | 78-42-2    | 37,000            | 300               | <chem>C(CCCC)(CC)COP(=O)(OCC(CCCC)CC)OCC(CCCC)CC</chem>  | 28                    |
| 75  | 78-44-4    | 1320              | 100               | <chem>O=C(OCC(COC(=O)NC(C)C)(C)CCC)N</chem>              | 91                    |
| 76  | 78-51-3    | 3000              | 300               | <chem>C(CCC)OCCOP(=O)(OCCOCCCC)OCCOCCCC</chem>           | 28                    |
| 77  | 78-67-1    | 100               | 2                 | <chem>C(#N)C(C)(C)N=NC(C)(C)C#N</chem>                   | 42                    |
| 78  | 78-97-7    | 87                | 30                | <chem>C(#N)C(C)O</chem>                                  | 43                    |
| 79  | 79-27-6    | 1200              | 20                | <chem>C(Br)(Br)C(Br)Br</chem>                            | 28                    |
| 80  | 793-24-8   | 3580              | 20                | <chem>c1(NC(C)CC(C)C)ccc(Nc2cccc2)cc1</chem>             | 28                    |
| 81  | 79-39-0    | 459               | 30                | <chem>C(N)(=O)C(=C)C</chem>                              | 28                    |
| 82  | 8003-22-3  | 5000              | 500               | <chem>O=C4c1cccc1C(=O)C4c2nc3cccc3cc2</chem>             | 91                    |
| 83  | 80-09-1    | 4556              | 200               | <chem>c1(S(=O)(=O)c2ccc(O)cc2)ccc(O)cc1</chem>           | 28                    |
| 84  | 80-43-3    | 4100              | 200               | <chem>C(C)(C)(c1cccc1)OOC(C)(C)c1cccc1</chem>            | 28                    |
| 85  | 81-16-3    | 19,400            | 1000              | <chem>c1(N)c(S(=O)(=O)O)c2c(cccc2)cc1</chem>             | 49                    |
| 86  | 822-36-6   | 751               | 625               | <chem>CC1=CN=CN1</chem>                                  | 98                    |



Table S2. Cont.

| Sr. | CAS      | LD50<br>(mg/kg/d) | LOEL<br>(mg/kg/d) | SMILES                                                           | Study Period<br>(Day) |
|-----|----------|-------------------|-------------------|------------------------------------------------------------------|-----------------------|
| 87  | 84-51-5  | 2795              | 10                | <chem>c12C(=O)c3c(C(=O)c1cc(CC)cc2)cccc3</chem>                  | 28                    |
| 88  | 84-74-2  | 7499              | 2500              | <chem>CCCCOC(=O)c1cccc1C(=O)OCCCC</chem>                         | 91                    |
| 89  | 86-87-3  | 1000              | 125               | <chem>c1(CC(=O)O)c2c(cccc2)ccc1</chem>                           | 28                    |
| 90  | 868-77-9 | 5050              | 100               | <chem>C(=O)(C(=C)C)OCCO</chem>                                   | 49                    |
| 91  | 87-59-2  | 933               | 60                | <chem>c1(N)c(C)c(C)ccc1</chem>                                   | 28                    |
| 92  | 87-62-7  | 840               | 50                | <chem>c1(C)c(N)c(C)ccc1</chem>                                   | 42                    |
| 93  | 88-09-5  | 2200              | 50                | <chem>C(=O)(O)C(CC)CC</chem>                                     | 42                    |
| 94  | 88-44-8  | 11,700            | 1000              | <chem>c1(N)c(S(=O)(=O)O)cc(C)cc1</chem>                          | 28                    |
| 95  | 88-72-2  | 891               | 625               | <chem>CC1=CC=CC=C1N(=O)=O</chem>                                 | 91                    |
| 96  | 88-85-7  | 25                | 0.78              | <chem>c1(N(=O)=O)c(O)c(C(C)CC)cc(N(=O)=O)c1</chem>               | 42                    |
| 97  | 88-89-1  | 200               | 100               | <chem>OC1=C(C=C(C=C1N(=O)=O)N(=O)=O)N(=O)=O</chem>               | 28                    |
| 98  | 89-63-4  | 400               | 10                | <chem>c1(N)c(N(=O)=O)cc(Cl)cc1</chem>                            | 42                    |
| 99  | 92-88-6  | 4920              | 40                | <chem>c1(-c2ccc(O)cc2)ccc(O)cc1</chem>                           | 42                    |
| 100 | 941-69-5 | 58                | 5                 | <chem>C1(=O)C=CC(=O)N1c1cccc1</chem>                             | 49                    |
| 101 | 95-14-7  | 560               | 30                | <chem>c12c(cccc1)N=NN2</chem>                                    | 42                    |
| 102 | 95-33-0  | 5300              | 250               | <chem>c12c(cccc1)N=C(SNC1CCCCC1)S2</chem>                        | 28                    |
| 103 | 95-68-1  | 467               | 2                 | <chem>c1(N)c(C)cc(C)cc1</chem>                                   | 28                    |
| 104 | 95-85-2  | 690               | 250               | <chem>c1(O)c(N)cc(Cl)cc1</chem>                                  | 42                    |
| 105 | 95-94-3  | 1500              | 30                | <chem>c1c(c(cc(c1Cl)Cl)Cl)Cl</chem>                              | 91                    |
| 106 | 96-29-7  | 930               | 20                | <chem>C(C)(CC)=NO</chem>                                         | 28                    |
| 107 | 96-45-7  | 1832              | 6                 | <chem>C1(=S)NCCN1</chem>                                         | 28                    |
| 108 | 96-69-5  | 2345              | 60                | <chem>C(C)(C)(C)c1c(O)cc(C)c(Sc2c(C)cc(O)c(C(C)(C)C)c2)c1</chem> | 28                    |
| 109 | 97-00-7  | 640               | 6                 | <chem>c1(Cl)c(N(=O)=O)cc(N(=O)=O)cc1</chem>                      | 42                    |
| 110 | 97-39-2  | 500               | 30                | <chem>CC1=CC=CC=C1NC(=NC2=CC=CC=C2C)N</chem>                     | 28                    |
| 111 | 97-52-9  | 997               | 100               | <chem>COc1cc(ccc1N)N(=O)=O</chem>                                | 28                    |
| 112 | 97-88-1  | 16,000            | 100               | <chem>C(=O)(C(=C)C)OCCCC</chem>                                  | 44                    |
| 113 | 97-99-4  | 1600              | 150               | <chem>C1(CO)CCCO1</chem>                                         | 28                    |
| 114 | 98-29-3  | 2820              | 781               | <chem>CC(C)(C)C1=CC(=C(C=C1)O)O</chem>                           | 98                    |
| 115 | 99-08-1  | 1072              | 625               | <chem>CC1=CC(=CC=C1)N(=O)=O</chem>                               | 91                    |
| 116 | 99-09-2  | 535               | 15                | <chem>NC1=CC=CC(=C1)N(=O)=O</chem>                               | 28                    |
| 117 | 99-54-7  | 953               | 4                 | <chem>ClC1=C(Cl)C=C(C=C1)N(=O)=O</chem>                          | 42                    |
| 118 | 99-99-0  | 1960              | 625               | <chem>Cc1ccc(cc1)N(=O)=O</chem>                                  | 91                    |

**Table S3.** Training set Actual class vs. Predicted class.

| <b>Sr.</b> | <b>Predicted Class</b> | <b>Actual Class</b> |
|------------|------------------------|---------------------|
| 1          | 1                      | 1                   |
| 2          | 1                      | 1                   |
| 3          | 2                      | 1                   |
| 4          | 1                      | 1                   |
| 5          | 2                      | 1                   |
| 6          | 1                      | 1                   |
| 7          | 1                      | 1                   |
| 8          | 2                      | 1                   |
| 9          | 1                      | 2                   |
| 10         | 2                      | 2                   |
| 11         | 2                      | 1                   |
| 12         | 1                      | 1                   |
| 13         | 1                      | 1                   |
| 14         | 2                      | 2                   |
| 15         | 2                      | 2                   |
| 16         | 1                      | 1                   |
| 17         | 1                      | 1                   |
| 18         | 2                      | 2                   |
| 19         | 1                      | 1                   |
| 20         | 2                      | 2                   |
| 21         | 1                      | 1                   |
| 22         | 2                      | 2                   |
| 23         | 1                      | 1                   |
| 24         | 2                      | 1                   |
| 25         | 2                      | 2                   |
| 26         | 2                      | 2                   |
| 27         | 1                      | 1                   |
| 28         | 2                      | 2                   |
| 29         | 2                      | 2                   |
| 30         | 1                      | 2                   |
| 31         | 1                      | 1                   |
| 32         | 1                      | 1                   |
| 33         | 2                      | 2                   |
| 34         | 1                      | 1                   |
| 35         | 2                      | 2                   |
| 36         | 2                      | 2                   |
| 37         | 1                      | 1                   |
| 38         | 1                      | 2                   |
| 39         | 2                      | 2                   |
| 40         | 1                      | 1                   |
| 41         | 2                      | 1                   |
| 42         | 2                      | 2                   |
| 43         | 1                      | 2                   |
| 44         | 2                      | 1                   |
| 45         | 2                      | 1                   |

**Table S3. Cont.**

| <b>Sr.</b> | <b>Predicted Class</b> | <b>Actual Class</b> |
|------------|------------------------|---------------------|
| 46         | 1                      | 1                   |
| 47         | 1                      | 1                   |
| 48         | 1                      | 1                   |
| 49         | 1                      | 1                   |
| 50         | 1                      | 2                   |
| 51         | 2                      | 1                   |
| 52         | 1                      | 1                   |
| 53         | 2                      | 2                   |
| 54         | 1                      | 2                   |
| 55         | 1                      | 1                   |
| 56         | 2                      | 2                   |
| 57         | 1                      | 1                   |
| 58         | 2                      | 2                   |
| 59         | 2                      | 2                   |
| 60         | 2                      | 1                   |
| 61         | 1                      | 1                   |
| 62         | 1                      | 1                   |
| 63         | 1                      | 2                   |
| 64         | 1                      | 1                   |
| 65         | 1                      | 2                   |
| 66         | 1                      | 2                   |
| 67         | 2                      | 2                   |
| 68         | 1                      | 1                   |
| 69         | 2                      | 2                   |
| 70         | 2                      | 2                   |
| 71         | 2                      | 2                   |
| 72         | 1                      | 1                   |
| 73         | 1                      | 1                   |
| 74         | 2                      | 2                   |
| 75         | 1                      | 1                   |
| 76         | 1                      | 1                   |
| 77         | 2                      | 2                   |
| 78         | 2                      | 1                   |
| 79         | 1                      | 1                   |
| 80         | 2                      | 2                   |
| 81         | 1                      | 1                   |
| 82         | 1                      | 1                   |
| 83         | 1                      | 1                   |
| 84         | 2                      | 1                   |
| 85         | 2                      | 1                   |
| 86         | 2                      | 2                   |
| 87         | 1                      | 1                   |
| 88         | 1                      | 1                   |
| 89         | 1                      | 1                   |
| 90         | 1                      | 2                   |

**Table S3. Cont.**

| <b>Sr.</b> | <b>Predicted Class</b> | <b>Actual Class</b> |
|------------|------------------------|---------------------|
| 91         | 1                      | 2                   |
| 92         | 1                      | 1                   |
| 93         | 1                      | 1                   |
| 94         | 1                      | 1                   |

**Table S4.** Test set Actual class vs. Predicted class.

| <b>Sr.</b> | <b>Predicted Class</b> | <b>Actual Class</b> |
|------------|------------------------|---------------------|
| 1          | 1                      | 1                   |
| 2          | 1                      | 1                   |
| 3          | 1                      | 1                   |
| 4          | 2                      | 2                   |
| 5          | 2                      | 2                   |
| 6          | 1                      | 2                   |
| 7          | 2                      | 2                   |
| 8          | 1                      | 1                   |
| 9          | 1                      | 1                   |
| 10         | 2                      | 2                   |
| 11         | 2                      | 1                   |
| 12         | 2                      | 2                   |
| 13         | 1                      | 1                   |
| 14         | 2                      | 1                   |
| 15         | 2                      | 2                   |
| 16         | 2                      | 2                   |
| 17         | 1                      | 1                   |
| 18         | 2                      | 2                   |
| 19         | 2                      | 1                   |
| 20         | 2                      | 2                   |
| 21         | 1                      | 1                   |
| 22         | 1                      | 1                   |
| 23         | 2                      | 1                   |
| 24         | 1                      | 1                   |





Table S5. Cont.

| Sr | Data      | Target                                                                              | Analog 1                                                                            | Analog 2                                                                            | Analog 3                                                                              | LOEL Predicted | Fold_diff |
|----|-----------|-------------------------------------------------------------------------------------|-------------------------------------------------------------------------------------|-------------------------------------------------------------------------------------|---------------------------------------------------------------------------------------|----------------|-----------|
| 14 | Structure | 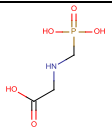   |    |    |     |                |           |
|    | LD50      | 4873                                                                                | 3000                                                                                | 3200                                                                                | 7700                                                                                  |                |           |
|    | LOEL      | 3130                                                                                | 1000                                                                                | 100                                                                                 | 600                                                                                   | 566.67         | 1.84      |
| 15 | Structure |    |    |    |     |                |           |
|    | LD50      | 3200                                                                                | 37,000                                                                              | 2370                                                                                | 840                                                                                   |                |           |
|    | LOEL      | 100                                                                                 | 300                                                                                 | 750                                                                                 | 40                                                                                    | 363.33         | 3.63      |
| 16 | Structure |   |   |   |    |                |           |
|    | LD50      | 256                                                                                 | 1140                                                                                | 690                                                                                 | 1500                                                                                  |                |           |
|    | LOEL      | 10                                                                                  | 10                                                                                  | 250                                                                                 | 30                                                                                    | 96.67          | 9.67      |
| 17 | Structure |  |  |  |   |                |           |
|    | LD50      | 450                                                                                 | 707                                                                                 | 933                                                                                 | 840                                                                                   |                |           |
|    | LOEL      | 30                                                                                  | 60                                                                                  | 60                                                                                  | 50                                                                                    | 56.67          | 1.89      |
| 18 | Structure |  |  |  |  |                |           |
|    | LD50      | 8532                                                                                | 500                                                                                 | 29,200                                                                              | 12,900                                                                                |                |           |
|    | LOEL      | 1000                                                                                | 30                                                                                  | 1000                                                                                | 1000                                                                                  | 676.67         | 1.47      |
| 19 | Structure |  |  |  |   |                |           |
|    | LD50      | 707                                                                                 | 450                                                                                 | 933                                                                                 | 840                                                                                   |                |           |
|    | LOEL      | 60                                                                                  | 30                                                                                  | 60                                                                                  | 50                                                                                    | 46.67          | 1.29      |

Table S5. Cont.

| Sr | Data      | Target                                                                              | Analog 1                                                                            | Analog 2                                                                            | Analog 3                                                                             | LOEL Predicted | Fold_diff |
|----|-----------|-------------------------------------------------------------------------------------|-------------------------------------------------------------------------------------|-------------------------------------------------------------------------------------|--------------------------------------------------------------------------------------|----------------|-----------|
| 20 | Structure | 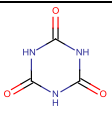   |    |    |    |                |           |
|    | LD50      | 7700                                                                                | 4873                                                                                | 4000                                                                                | 9500                                                                                 |                |           |
|    | LOEL      | 600                                                                                 | 3130                                                                                | 160                                                                                 | 62.5                                                                                 | 1 117.50       | 1.86      |
| 21 | Structure |    |    |    |    |                |           |
|    | LD50      | 930                                                                                 | 670                                                                                 | 250                                                                                 | 1140                                                                                 |                |           |
|    | LOEL      | 20                                                                                  | 30                                                                                  | 200                                                                                 | 10                                                                                   | 80.00          | 4.00      |
| 22 | Structure |    |   |   |  |                |           |
|    | LD50      | 2370                                                                                | 3000                                                                                | 3200                                                                                | 1780                                                                                 |                |           |
|    | LOEL      | 750                                                                                 | 1000                                                                                | 100                                                                                 | 200                                                                                  | 433.33         | 1.73      |
| 23 | Structure |  |  |  |  |                |           |
|    | LD50      | 1400                                                                                | 1500                                                                                | 5300                                                                                | 256                                                                                  |                |           |
|    | LOEL      | 25                                                                                  | 30                                                                                  | 250                                                                                 | 10                                                                                   | 96.67          | 3.87      |
| 24 | Structure |  |  |  |  |                |           |
|    | LD50      | 1525                                                                                | 19,500                                                                              | 1070                                                                                | 2370                                                                                 |                |           |
|    | LOEL      | 200                                                                                 | 300                                                                                 | 100                                                                                 | 750                                                                                  | 383.33         | 1.92      |
| 25 | Structure |  |  |  |  |                |           |
|    | LD50      | 3000                                                                                | 4873                                                                                | 2520                                                                                | 5050                                                                                 |                |           |
|    | LOEL      | 1000                                                                                | 3130                                                                                | 100                                                                                 | 100                                                                                  | 1110.00        | 1.11      |





Table S5. Cont.

| Sr | Data      | Target                                                                              | Analog 1                                                                            | Analog 2                                                                            | Analog 3                                                                              | LOEL Predicted | Fold_diff |
|----|-----------|-------------------------------------------------------------------------------------|-------------------------------------------------------------------------------------|-------------------------------------------------------------------------------------|---------------------------------------------------------------------------------------|----------------|-----------|
| 32 | Structure | 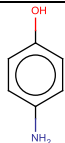   |    |    |    |                |           |
|    | LD50      | 375                                                                                 | 924                                                                                 | 690                                                                                 | 256                                                                                   |                |           |
|    | LOEL      | 100                                                                                 | 240                                                                                 | 250                                                                                 | 10                                                                                    | 166.67         | 1.67      |
| 33 | Structure |    |    |    |    |                |           |
|    | LD50      | 2520                                                                                | 14,100                                                                              | 5050                                                                                | 12,900                                                                                |                |           |
|    | LOEL      | 100                                                                                 | 200                                                                                 | 100                                                                                 | 1000                                                                                  | 433.33         | 4.33      |
| 34 | Structure |  |  |  |  |                |           |
|    | LD50      | 120                                                                                 | 87                                                                                  | 459                                                                                 | 16,000                                                                                |                |           |
|    | LOEL      | 30                                                                                  | 30                                                                                  | 30                                                                                  | 100                                                                                   | 53.33          | 1.78      |
| 35 | Structure |  |  |  |   |                |           |
|    | LD50      | 7400                                                                                | 7499                                                                                | 2795                                                                                | 3710                                                                                  |                |           |
|    | LOEL      | 3130                                                                                | 2500                                                                                | 10                                                                                  | 350                                                                                   | 953.33         | 1.09      |
| 36 | Structure |  |  |  |   |                |           |
|    | LD50      | 29,200                                                                              | 8532                                                                                | 1780                                                                                | 500                                                                                   |                |           |
|    | LOEL      | 1000                                                                                | 1000                                                                                | 11                                                                                  | 30                                                                                    | 347.00         | 2.88      |
| 37 | Structure |  |  |  |   |                |           |
|    | LD50      | 540                                                                                 | 450                                                                                 | 707                                                                                 | 933                                                                                   |                |           |
|    | LOEL      | 40                                                                                  | 30                                                                                  | 60                                                                                  | 60                                                                                    | 50.00          | 1.25      |

Table S5. Cont.

| Sr | Data      | Target                                                                              | Analog 1                                                                            | Analog 2                                                                            | Analog 3                                                                              | LOEL Predicted | Fold_diff |
|----|-----------|-------------------------------------------------------------------------------------|-------------------------------------------------------------------------------------|-------------------------------------------------------------------------------------|---------------------------------------------------------------------------------------|----------------|-----------|
| 38 | Structure | 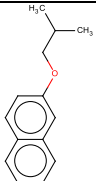   |    |    |     |                |           |
|    | LD50      | 5930                                                                                | 540                                                                                 | 3580                                                                                | 2050                                                                                  |                |           |
|    | LOEL      | 100                                                                                 | 40                                                                                  | 20                                                                                  | 30                                                                                    | 30.00          | 1.11      |
| 39 | Structure |   |    |    |   |                |           |
|    | LD50      | 3000                                                                                | 2370                                                                                | 12,918                                                                              | 3200                                                                                  |                |           |
|    | LOEL      | 1000                                                                                | 750                                                                                 | 100                                                                                 | 100                                                                                   | 316.67         | 1.05      |
| 40 | Structure |  |  |  |  |                |           |
|    | LD50      | 880                                                                                 | 373                                                                                 | 353                                                                                 | 3000                                                                                  |                |           |
|    | LOEL      | 300                                                                                 | 70                                                                                  | 20                                                                                  | 250                                                                                   | 113.33         | 2.65      |
| 41 | Structure |  |  |  |   |                |           |
|    | LD50      | 1751                                                                                | 4696                                                                                | 16,000                                                                              | 500                                                                                   |                |           |
|    | LOEL      | 200                                                                                 | 150                                                                                 | 100                                                                                 | 30                                                                                    | 93.33          | 2.14      |
| 42 | Structure |  |  |  |  |                |           |
|    | LD50      | 4510                                                                                | 3200                                                                                | 37,000                                                                              | 1780                                                                                  |                |           |
|    | LOEL      | 30                                                                                  | 100                                                                                 | 300                                                                                 | 200                                                                                   | 200.00         | 6.67      |

Table S5. Cont.

| Sr | Data      | Target                                                                              | Analog 1                                                                            | Analog 2                                                                            | Analog 3                                                                              | LOEL Predicted | Fold_diff |
|----|-----------|-------------------------------------------------------------------------------------|-------------------------------------------------------------------------------------|-------------------------------------------------------------------------------------|---------------------------------------------------------------------------------------|----------------|-----------|
| 43 | Structure | 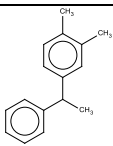   |    |    |     |                |           |
|    | LD50      | 2050                                                                                | 720                                                                                 | 3580                                                                                | 450                                                                                   |                |           |
|    | LOEL      | 30                                                                                  | 30                                                                                  | 20                                                                                  | 30                                                                                    | 26.67          | 1.12      |
| 44 | Structure |    |    |    |     |                |           |
|    | LD50      | 1050                                                                                | 2795                                                                                | 7400                                                                                | 7499                                                                                  |                |           |
|    | LOEL      | 5                                                                                   | 10                                                                                  | 3130                                                                                | 2500                                                                                  | 1880.00        | 376.00    |
| 45 | Structure |   |   |   |   |                |           |
|    | LD50      | 840                                                                                 | 3200                                                                                | 37,000                                                                              | 12,900                                                                                |                |           |
|    | LOEL      | 40                                                                                  | 100                                                                                 | 300                                                                                 | 1000                                                                                  | 466.67         | 11.67     |
| 46 | Structure |  |  |  |  |                |           |
|    | LD50      | 72                                                                                  | 930                                                                                 | 4510                                                                                | 500                                                                                   |                |           |
|    | LOEL      | 2                                                                                   | 20                                                                                  | 30                                                                                  | 30                                                                                    | 26.67          | 13.33     |
| 47 | Structure |  |  |  |  |                |           |
|    | LD50      | 300                                                                                 | 560                                                                                 | 751                                                                                 | 5000                                                                                  |                |           |
|    | LOEL      | 1.2                                                                                 | 30                                                                                  | 625                                                                                 | 500                                                                                   | 385.00         | 320.83    |
| 48 | Structure |  |  |  |  |                |           |
|    | LD50      | 924                                                                                 | 375                                                                                 | 690                                                                                 | 256                                                                                   |                |           |
|    | LOEL      | 240                                                                                 | 100                                                                                 | 250                                                                                 | 10                                                                                    | 120.00         | 2         |

Table S5. Cont.

| Sr | Data      | Target                                                                              | Analog 1                                                                            | Analog 2                                                                            | Analog 3                                                                              | LOEL Predicted | Fold_diff |
|----|-----------|-------------------------------------------------------------------------------------|-------------------------------------------------------------------------------------|-------------------------------------------------------------------------------------|---------------------------------------------------------------------------------------|----------------|-----------|
| 49 | Structure |    |    |    |    |                |           |
|    | LD50      | 130                                                                                 | 1780                                                                                | 16,000                                                                              | 4696                                                                                  |                |           |
|    | LOEL      | 6                                                                                   | 11                                                                                  | 100                                                                                 | 150                                                                                   | 87.00          | 14.50     |
| 50 | Structure |    |    |    |    |                |           |
|    | LD50      | 4950                                                                                | 375                                                                                 | 924                                                                                 | 4920                                                                                  |                |           |
|    | LOEL      | 250                                                                                 | 100                                                                                 | 240                                                                                 | 40                                                                                    | 126.67         | 1.97      |
| 51 | Structure |   |   |   |   |                |           |
|    | LD50      | 1780                                                                                | 29,200                                                                              | 130                                                                                 | 12,900                                                                                |                |           |
|    | LOEL      | 11                                                                                  | 1000                                                                                | 6                                                                                   | 1000                                                                                  | 668.67         | 60.79     |
| 52 | Structure |  |  |  |  |                |           |
|    | LD50      | 55                                                                                  | 1185                                                                                | 3000                                                                                | 120                                                                                   |                |           |
|    | LOEL      | 2                                                                                   | 30                                                                                  | 1000                                                                                | 30                                                                                    | 353.33         | 176.67    |
| 53 | Structure |  |  |  |   |                |           |
|    | LD50      | 9500                                                                                | 1832                                                                                | 7700                                                                                | 4873                                                                                  |                |           |
|    | LOEL      | 62.5                                                                                | 6                                                                                   | 600                                                                                 | 3130                                                                                  | 1 245.33       | 19.93     |
| 54 | Structure |  |  |  |   |                |           |
|    | LD50      | 12,918                                                                              | 3000                                                                                | 8532                                                                                | 37,000                                                                                |                |           |
|    | LOEL      | 100                                                                                 | 1000                                                                                | 1000                                                                                | 300                                                                                   | 766.67         | 7.67      |

Table S5. Cont.

| Sr | Data      | Target                                                                              | Analog 1                                                                            | Analog 2                                                                            | Analog 3                                                                             | LOEL Predicted | Fold_diff |
|----|-----------|-------------------------------------------------------------------------------------|-------------------------------------------------------------------------------------|-------------------------------------------------------------------------------------|--------------------------------------------------------------------------------------|----------------|-----------|
| 55 | Structure |    |    |    |    |                |           |
|    | LD50      | 500                                                                                 | 1780                                                                                | 1070                                                                                | 4696                                                                                 |                |           |
|    | LOEL      | 40                                                                                  | 200                                                                                 | 100                                                                                 | 150                                                                                  | 150.00         | 3.75      |
| 56 | Structure |    |    |    |   |                |           |
|    | LD50      | 4729                                                                                | 14,100                                                                              | 12,918                                                                              | 4100                                                                                 |                |           |
|    | LOEL      | 10                                                                                  | 200                                                                                 | 100                                                                                 | 200                                                                                  | 166.67         | 16.67     |
| 57 | Structure |    |    |    |    |                |           |
|    | LD50      | 353                                                                                 | 373                                                                                 | 880                                                                                 | 29,200                                                                               |                |           |
|    | LOEL      | 20                                                                                  | 70                                                                                  | 300                                                                                 | 1000                                                                                 | 456.67         | 22.83     |
| 58 | Structure |  |  |  |  |                |           |
|    | LD50      | 14,100                                                                              | 19,500                                                                              | 2520                                                                                | 1070                                                                                 |                |           |
|    | LOEL      | 200                                                                                 | 300                                                                                 | 100                                                                                 | 100                                                                                  | 166.67         | 1.20      |
| 59 | Structure |  |  |  |  |                |           |
|    | LD50      | 37,000                                                                              | 3200                                                                                | 8532                                                                                | 840                                                                                  |                |           |
|    | LOEL      | 300                                                                                 | 100                                                                                 | 1000                                                                                | 40                                                                                   | 380.00         | 1.27      |
| 60 | Structure |  |  |  |  |                |           |
|    | LD50      | 1320                                                                                | 8532                                                                                | 500                                                                                 | 29,200                                                                               |                |           |
|    | LOEL      | 100                                                                                 | 1000                                                                                | 30                                                                                  | 1000                                                                                 | 676.67         | 6.77      |
| 61 | Structure |  |  |  |  |                |           |
|    | LD50      | 87                                                                                  | 120                                                                                 | 3000                                                                                | 25                                                                                   |                |           |
|    | LOEL      | 30                                                                                  | 30                                                                                  | 1000                                                                                | 0.78                                                                                 | 343.59         | 11.45     |

Table S5. Cont.

| Sr | Data      | Target                                                                              | Analog 1                                                                            | Analog 2                                                                            | Analog 3                                                                             | LOEL Predicted | Fold_diff |
|----|-----------|-------------------------------------------------------------------------------------|-------------------------------------------------------------------------------------|-------------------------------------------------------------------------------------|--------------------------------------------------------------------------------------|----------------|-----------|
| 62 | Structure | 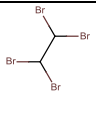   |    |    |    |                |           |
|    | LD50      | 1200                                                                                | 373                                                                                 | 930                                                                                 | 880                                                                                  |                |           |
|    | LOEL      | 20                                                                                  | 70                                                                                  | 20                                                                                  | 300                                                                                  | 130.00         | 6.50      |
| 63 | Structure |    |    |    |    |                |           |
|    | LD50      | 3580                                                                                | 720                                                                                 | 2050                                                                                | 5930                                                                                 |                |           |
|    | LOEL      | 20                                                                                  | 30                                                                                  | 30                                                                                  | 100                                                                                  | 53.33          | 2.67      |
| 64 | Structure |    |    |   |   |                |           |
|    | LD50      | 459                                                                                 | 16,000                                                                              | 4696                                                                                | 500                                                                                  |                |           |
|    | LOEL      | 30                                                                                  | 100                                                                                 | 150                                                                                 | 30                                                                                   | 93.33          | 3.11      |
| 65 | Structure |  |  |  |  |                |           |
|    | LD50      | 5000                                                                                | 5300                                                                                | 300                                                                                 | 2795                                                                                 |                |           |
|    | LOEL      | 500                                                                                 | 250                                                                                 | 1.2                                                                                 | 10                                                                                   | 87.07          | 1.91      |
| 66 | Structure |  |  |  |  |                |           |
|    | LD50      | 4100                                                                                | 2820                                                                                | 540                                                                                 | 2345                                                                                 |                |           |
|    | LOEL      | 200                                                                                 | 781                                                                                 | 40                                                                                  | 60                                                                                   | 293.67         | 1.47      |
| 67 | Structure |  |  |  |  |                |           |
|    | LD50      | 19,400                                                                              | 11,700                                                                              | 375                                                                                 | 924                                                                                  |                |           |
|    | LOEL      | 1000                                                                                | 1000                                                                                | 100                                                                                 | 240                                                                                  | 446.67         | 2.23      |
| 68 | Structure |  |  |  |  |                |           |
|    | LD50      | 751                                                                                 | 300                                                                                 | 450                                                                                 | 707                                                                                  |                |           |
|    | LOEL      | 625                                                                                 | 1.2                                                                                 | 30                                                                                  | 60                                                                                   | 30.40          | 6.85      |

Table S5. Cont.

| Sr | Data      | Target                                                                              | Analog 1                                                                            | Analog 2                                                                            | Analog 3                                                                              | LOEL Predicted | Fold_diff |
|----|-----------|-------------------------------------------------------------------------------------|-------------------------------------------------------------------------------------|-------------------------------------------------------------------------------------|---------------------------------------------------------------------------------------|----------------|-----------|
| 69 | Structure | 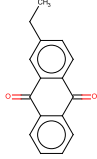   |    |    |    |                |           |
|    | LD50      | 2795                                                                                | 7499                                                                                | 7400                                                                                | 12,900                                                                                |                |           |
|    | LOEL      | 10                                                                                  | 2500                                                                                | 3130                                                                                | 1000                                                                                  | 2210.00        | 221.00    |
| 70 | Structure |    |    |    |    |                |           |
|    | LD50      | 7499                                                                                | 2795                                                                                | 7400                                                                                | 12,900                                                                                |                |           |
|    | LOEL      | 2500                                                                                | 10                                                                                  | 3130                                                                                | 1000                                                                                  | 1380.00        | 1.81      |
| 71 | Structure |  |  |  |  |                |           |
|    | LD50      | 5050                                                                                | 16,000                                                                              | 4696                                                                                | 500                                                                                   |                |           |
|    | LOEL      | 100                                                                                 | 100                                                                                 | 150                                                                                 | 30                                                                                    | 93.33          | 1.07      |
| 72 | Structure |  |  |  |  |                |           |
|    | LD50      | 933                                                                                 | 450                                                                                 | 707                                                                                 | 840                                                                                   |                |           |
|    | LOEL      | 60                                                                                  | 30                                                                                  | 60                                                                                  | 50                                                                                    | 46.67          | 1.29      |
| 73 | Structure |  |  |  |  |                |           |
|    | LD50      | 840                                                                                 | 450                                                                                 | 707                                                                                 | 933                                                                                   |                |           |
|    | LOEL      | 50                                                                                  | 30                                                                                  | 60                                                                                  | 60                                                                                    | 50.00          | 1.00      |
| 74 | Structure |  |  |  |  |                |           |
|    | LD50      | 11,700                                                                              | 3710                                                                                | 19,400                                                                              | 450                                                                                   |                |           |
|    | LOEL      | 1000                                                                                | 350                                                                                 | 1000                                                                                | 30                                                                                    | 460.00         | 2.17      |
| 75 | Structure |  |  |  |  |                |           |
|    | LD50      | 891                                                                                 | 1072                                                                                | 1960                                                                                | 3710                                                                                  |                |           |
|    | LOEL      | 625                                                                                 | 625                                                                                 | 625                                                                                 | 350                                                                                   | 533.33         | 1.17      |



Table S5. Cont.

| Sr | Data      | Target                                                                              | Analog 1                                                                            | Analog 2                                                                            | Analog 3                                                                             | LOEL Predicted | Fold_diff |
|----|-----------|-------------------------------------------------------------------------------------|-------------------------------------------------------------------------------------|-------------------------------------------------------------------------------------|--------------------------------------------------------------------------------------|----------------|-----------|
| 76 | Structure | 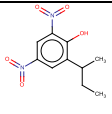   |    |    |    |                |           |
|    | LD50      | 25                                                                                  | 3710                                                                                | 891                                                                                 | 1072                                                                                 |                |           |
|    | LOEL      | 0.78                                                                                | 350                                                                                 | 625                                                                                 | 625                                                                                  | 533.33         | 683.76    |
| 77 | Structure |    |    |    |    |                |           |
|    | LD50      | 4920                                                                                | 375                                                                                 | 924                                                                                 | 4950                                                                                 |                |           |
|    | LOEL      | 40                                                                                  | 100                                                                                 | 240                                                                                 | 250                                                                                  | 196.67         | 4.92      |
| 78 | Structure |    |    |    |    |                |           |
|    | LD50      | 58                                                                                  | 1000                                                                                | 2795                                                                                | 7400                                                                                 |                |           |
|    | LOEL      | 5                                                                                   | 5                                                                                   | 10                                                                                  | 3130                                                                                 | 1 048.33       | 209.67    |
| 79 | Structure |  |  |  |  |                |           |
|    | LD50      | 560                                                                                 | 300                                                                                 | 751                                                                                 | 5000                                                                                 |                |           |
|    | LOEL      | 30                                                                                  | 1.2                                                                                 | 625                                                                                 | 500                                                                                  | 375.40         | 12.51     |
| 80 | Structure |  |  |  |  |                |           |
|    | LD50      | 5300                                                                                | 3580                                                                                | 5930                                                                                | 5000                                                                                 |                |           |
|    | LOEL      | 250                                                                                 | 20                                                                                  | 100                                                                                 | 500                                                                                  | 206.67         | 1.21      |
| 81 | Structure |  |  |  |  |                |           |
|    | LD50      | 467                                                                                 | 450                                                                                 | 707                                                                                 | 933                                                                                  |                |           |
|    | LOEL      | 2                                                                                   | 30                                                                                  | 60                                                                                  | 60                                                                                   | 50.00          | 25.00     |
| 82 | Structure |  |  |  |  |                |           |
|    | LD50      | 690                                                                                 | 256                                                                                 | 375                                                                                 | 924                                                                                  |                |           |
|    | LOEL      | 250                                                                                 | 10                                                                                  | 100                                                                                 | 240                                                                                  | 116.67         | 2.14      |

Table S5. Cont.

| Sr | Data      | Target                                                                              | Analog 1                                                                            | Analog 2                                                                            | Analog 3                                                                              | LOEL Predicted | Fold_diff |
|----|-----------|-------------------------------------------------------------------------------------|-------------------------------------------------------------------------------------|-------------------------------------------------------------------------------------|---------------------------------------------------------------------------------------|----------------|-----------|
| 83 | Structure | 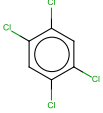   |    |    |    |                |           |
|    | LD50      | 1500                                                                                | 256                                                                                 | 1140                                                                                | 690                                                                                   |                |           |
|    | LOEL      | 30                                                                                  | 10                                                                                  | 10                                                                                  | 250                                                                                   | 90.00          | 3.00      |
| 84 | Structure |    |    |    |     |                |           |
|    | LD50      | 930                                                                                 | 2520                                                                                | 1070                                                                                | 2370                                                                                  |                |           |
|    | LOEL      | 20                                                                                  | 100                                                                                 | 100                                                                                 | 750                                                                                   | 316.67         | 15.83     |
| 85 | Structure |    |    |    |    |                |           |
|    | LD50      | 1832                                                                                | 9500                                                                                | 4873                                                                                | 373                                                                                   |                |           |
|    | LOEL      | 6                                                                                   | 62.5                                                                                | 3130                                                                                | 70                                                                                    | 1087.50        | 181.25    |
| 86 | Structure |   |   |   |    |                |           |
|    | LD50      | 2345                                                                                | 2820                                                                                | 4100                                                                                | 3710                                                                                  |                |           |
|    | LOEL      | 60                                                                                  | 781                                                                                 | 200                                                                                 | 350                                                                                   | 443.67         | 7.39      |
| 87 | Structure |  |  |  |  |                |           |
|    | LD50      | 640                                                                                 | 891                                                                                 | 1072                                                                                | 535                                                                                   |                |           |
|    | LOEL      | 6                                                                                   | 625                                                                                 | 625                                                                                 | 15                                                                                    | 421.67         | 70.28     |
| 88 | Structure |  |  |  |  |                |           |
|    | LD50      | 500                                                                                 | 450                                                                                 | 707                                                                                 | 933                                                                                   |                |           |
|    | LOEL      | 30                                                                                  | 30                                                                                  | 60                                                                                  | 60                                                                                    | 50.00          | 1.67      |
| 89 | Structure |  |  |  |  |                |           |
|    | LD50      | 997                                                                                 | 891                                                                                 | 1072                                                                                | 535                                                                                   |                |           |
|    | LOEL      | 100                                                                                 | 625                                                                                 | 625                                                                                 | 15                                                                                    | 421.67         | 4.22      |

Table S5. Cont.

| Sr | Data      | Target                                                                              | Analog 1                                                                            | Analog 2                                                                            | Analog 3                                                                             | LOEL Predicted | Fold_diff |
|----|-----------|-------------------------------------------------------------------------------------|-------------------------------------------------------------------------------------|-------------------------------------------------------------------------------------|--------------------------------------------------------------------------------------|----------------|-----------|
| 90 | Structure | 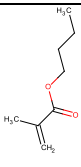   |    |    |    |                |           |
|    | LD50      | 16,000                                                                              | 4696                                                                                | 500                                                                                 | 1751                                                                                 |                |           |
|    | LOEL      | 100                                                                                 | 150                                                                                 | 30                                                                                  | 200                                                                                  | 126.67         | 1.27      |
| 91 | Structure |    |    |    |    |                |           |
|    | LD50      | 2820                                                                                | 2345                                                                                | 4100                                                                                | 450                                                                                  |                |           |
|    | LOEL      | 781                                                                                 | 60                                                                                  | 200                                                                                 | 30                                                                                   | 96.67          | 2.69      |
| 92 | Structure |    |    |   |   |                |           |
|    | LD50      | 1072                                                                                | 891                                                                                 | 1960                                                                                | 3710                                                                                 |                |           |
|    | LOEL      | 625                                                                                 | 625                                                                                 | 625                                                                                 | 350                                                                                  | 533.33         | 1.17      |
| 93 | Structure |  |  |  |  |                |           |
|    | LD50      | 535                                                                                 | 997                                                                                 | 891                                                                                 | 640                                                                                  |                |           |
|    | LOEL      | 15                                                                                  | 100                                                                                 | 625                                                                                 | 6                                                                                    | 243.67         | 16.24     |
| 94 | Structure |  |  |  |  |                |           |
|    | LD50      | 1960                                                                                | 891                                                                                 | 1072                                                                                | 3710                                                                                 |                |           |
|    | LOEL      | 625                                                                                 | 625                                                                                 | 625                                                                                 | 350                                                                                  | 533.33         | 1.17      |

Table S6. Prediction of test set compounds using 3 analogs obtained from *k*-NN classification.

| Sr | Data      | Target                                                                              | Ana-1                                                                               | Ana-2                                                                               | Ana-3                                                                                 | LOEL_pred | Fold_diff |
|----|-----------|-------------------------------------------------------------------------------------|-------------------------------------------------------------------------------------|-------------------------------------------------------------------------------------|---------------------------------------------------------------------------------------|-----------|-----------|
| 1  | Structure | 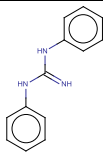   |    |    |    |           |           |
|    | LD50      | 323                                                                                 | 500                                                                                 | 720                                                                                 | 3580                                                                                  |           |           |
|    | LOEL      | 30                                                                                  | 30                                                                                  | 30                                                                                  | 20                                                                                    | 26.67     | 1.13      |
| 2  | Structure |    |    |    |    |           |           |
|    | LD50      | 1350                                                                                | 500                                                                                 | 29,200                                                                              | 130                                                                                   |           |           |
|    | LOEL      | 30                                                                                  | 30                                                                                  | 1000                                                                                | 6                                                                                     | 345.33    | 11.51     |
| 3  | Structure |    |    |    |    |           |           |
|    | LD50      | 64                                                                                  | 1525                                                                                | 1000                                                                                | 26                                                                                    |           |           |
|    | LOEL      | 1.5                                                                                 | 200                                                                                 | 5                                                                                   | 0.75                                                                                  | 68.58     | 45.72     |
| 4  | Structure |  |  |  |  |           |           |
|    | LD50      | 2125                                                                                | 2370                                                                                | 3000                                                                                | 3200                                                                                  |           |           |
|    | LOEL      | 1250                                                                                | 750                                                                                 | 1000                                                                                | 100                                                                                   | 616.67    | 2.03      |
| 5  | Structure |  |  |  |  |           |           |
|    | LD50      | 10,000                                                                              | 2820                                                                                | 2345                                                                                | 4950                                                                                  |           |           |
|    | LOEL      | 50                                                                                  | 781                                                                                 | 60                                                                                  | 250                                                                                   | 363.67    | 7.27      |
| 6  | Structure |  |  |  |  |           |           |
|    | LD50      | 5000                                                                                | 1500                                                                                | 256                                                                                 | 1140                                                                                  |           |           |
|    | LOEL      | 0.1                                                                                 | 30                                                                                  | 10                                                                                  | 10                                                                                    | 16.67     | 166.67    |

Table S6. Cont.

| Sr | Data      | Target                                                                              | Ana-1                                                                               | Ana-2                                                                               | Ana-3                                                                                 | LOEL_pred | Fold_diff |
|----|-----------|-------------------------------------------------------------------------------------|-------------------------------------------------------------------------------------|-------------------------------------------------------------------------------------|---------------------------------------------------------------------------------------|-----------|-----------|
| 7  | Structure | 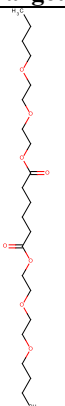   |    |    |    |           |           |
|    | LD50      | 6000                                                                                | 12,900                                                                              | 8532                                                                                | 1780                                                                                  |           |           |
|    | LOEL      | 1000                                                                                | 1000                                                                                | 1000                                                                                | 11                                                                                    | 670.33    | 1.49      |
| 8  | Structure |    |    |    |    |           |           |
|    | LD50      | 455                                                                                 | 4696                                                                                | 1751                                                                                | 130                                                                                   |           |           |
|    | LOEL      | 20                                                                                  | 150                                                                                 | 200                                                                                 | 6                                                                                     | 118.67    | 5.93      |
| 9  | Structure |  |  |  |  |           |           |
|    | LD50      | 1017                                                                                | 1050                                                                                | 2795                                                                                | 58                                                                                    |           |           |
|    | LOEL      | 20                                                                                  | 5                                                                                   | 10                                                                                  | 5                                                                                     | 6.67      | 3.00      |
| 10 | Structure |  |  |  |  |           |           |
|    | LD50      | 6420                                                                                | 5300                                                                                | 5930                                                                                | 5000                                                                                  |           |           |
|    | LOEL      | 100                                                                                 | 250                                                                                 | 100                                                                                 | 500                                                                                   | 283.33    | 2.83      |
| 11 | Structure |  |  |  |  |           |           |
|    | LD50      | 1809                                                                                | 12,900                                                                              | 8532                                                                                | 1780                                                                                  |           |           |
|    | LOEL      | 110                                                                                 | 1000                                                                                | 1000                                                                                | 11                                                                                    | 670.33    | 6.09      |
| 12 | Structure |  |  |  |  |           |           |
|    | LD50      | 16,000                                                                              | 3000                                                                                | 1070                                                                                | 2370                                                                                  |           |           |
|    | LOEL      | 1000                                                                                | 1000                                                                                | 100                                                                                 | 750                                                                                   | 616.67    | 1.62      |

Table S6. Cont.

| Sr | Data      | Target                                                                              | Ana-1                                                                               | Ana-2                                                                               | Ana-3                                                                                 | LOEL_pred | Fold_diff |
|----|-----------|-------------------------------------------------------------------------------------|-------------------------------------------------------------------------------------|-------------------------------------------------------------------------------------|---------------------------------------------------------------------------------------|-----------|-----------|
| 13 | Structure | 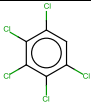   |    |    |    |           |           |
|    | LD50      | 1080                                                                                | 1500                                                                                | 256                                                                                 | 1140                                                                                  |           |           |
|    | LOEL      | 33                                                                                  | 30                                                                                  | 10                                                                                  | 10                                                                                    | 16.67     | 1.98      |
| 14 | Structure |    |    |    |    |           |           |
|    | LD50      | 1012                                                                                | 7400                                                                                | 7499                                                                                | 4100                                                                                  |           |           |
|    | LOEL      | 30                                                                                  | 3130                                                                                | 2500                                                                                | 200                                                                                   | 1943.33   | 64.78     |
| 15 | Structure |    |    |    |    |           |           |
|    | LD50      | 3200                                                                                | 2820                                                                                | 2345                                                                                | 450                                                                                   |           |           |
|    | LOEL      | 10                                                                                  | 781                                                                                 | 60                                                                                  | 30                                                                                    | 290.33    | 29.03     |
| 16 | Structure |   |   |   |   |           |           |
|    | LD50      | 3000                                                                                | 3200                                                                                | 37,000                                                                              | 840                                                                                   |           |           |
|    | LOEL      | 300                                                                                 | 100                                                                                 | 300                                                                                 | 40                                                                                    | 146.67    | 2.05      |
| 17 | Structure |  |  |  |  |           |           |
|    | LD50      | 100                                                                                 | 120                                                                                 | 87                                                                                  | 4729                                                                                  |           |           |
|    | LOEL      | 2                                                                                   | 30                                                                                  | 30                                                                                  | 10                                                                                    | 23.33     | 11.67     |
| 18 | Structure |  |  |  |  |           |           |
|    | LD50      | 4556                                                                                | 3710                                                                                | 19,400                                                                              | 11,700                                                                                |           |           |
|    | LOEL      | 200                                                                                 | 350                                                                                 | 1000                                                                                | 1000                                                                                  | 783.33    | 3.92      |
| 19 | Structure |  |  |  |  |           |           |
|    | LD50      | 1000                                                                                | 2795                                                                                | 4950                                                                                | 4920                                                                                  |           |           |
|    | LOEL      | 125                                                                                 | 10                                                                                  | 250                                                                                 | 40                                                                                    | 100.00    | 1.25      |
| 20 | Structure |  |  |  |  |           |           |
|    | LD50      | 2200                                                                                | 8532                                                                                | 2520                                                                                | 500                                                                                   |           |           |
|    | LOEL      | 50                                                                                  | 1000                                                                                | 100                                                                                 | 30                                                                                    | 376.67    | 7.53      |

Table S6. Cont.

| Sr | Data      | Target | Ana-1 | Ana-2 | Ana-3 | LOEL_pred | Fold_diff |
|----|-----------|--------|-------|-------|-------|-----------|-----------|
| 21 | Structure |        |       |       |       |           |           |
|    | LD50      | 200    | 3710  | 891   | 640   |           |           |
|    | LOEL      | 100    | 350   | 625   | 6     | 327.00    | 3.27      |
| 22 | Structure |        |       |       |       |           |           |
|    | LD50      | 400    | 640   | 535   | 256   |           |           |
|    | LOEL      | 10     | 6     | 15    | 10    | 10.33     | 1.03      |
| 23 | Structure |        |       |       |       |           |           |
|    | LD50      | 1600   | 3000  | 2370  | 1525  |           |           |
|    | LOEL      | 150    | 1000  | 750   | 200   | 650.00    | 4.33      |
| 24 | Structure |        |       |       |       |           |           |
|    | LD50      | 953    | 640   | 891   | 1072  |           |           |
|    | LOEL      | 4      | 6     | 625   | 625   | 418.67    | 104.67    |
